1 **Exploring Proteomes of Robust *Yarrowia lipolytica* Isolates Cultivated in**  
2 **Biomass Hydrolysate Reveal Key Processes Impacting Mixed Sugar Utilization,**  
3 **Lipid Accumulation, and Degradation**

4

5 Caleb Walker<sup>1</sup>, Bruce Dien<sup>2</sup>, Richard J. Giannone<sup>3</sup>, Patricia Slininger<sup>2</sup>, Stephanie R. Thompson<sup>2</sup>,  
6 and Cong T. Trinh<sup>1,\*</sup>

7

8 <sup>1</sup>Department of Chemical and Biomolecular Engineering, University of Tennessee, TN 37996

9 <sup>2</sup>The National Center for Agricultural Utilization Research, Peoria, IL 61604

10 <sup>3</sup>Biosciences Division, Oak Ridge National Laboratory, Oak Ridge, TN 37831

11

12 \*Corresponding authors. Email: [ctrinh@utk.edu](mailto:ctrinh@utk.edu). Tel: 865-974-8121

13

14 **ABSTRACT.** *Yarrowia lipolytica* is an oleaginous yeast exhibiting robust phenotypes  
15 beneficial for industrial biotechnology. The phenotypic diversity found within the undomesticated  
16 *Y. lipolytica* clade from various origins illuminates desirable phenotypic traits not found in the  
17 conventional laboratory strain CBS7504, which include xylose utilization, lipid accumulation, and  
18 growth on undetoxified biomass hydrolysates. Currently, the related phenotypes of lipid  
19 accumulation and degradation when metabolizing non-preferred sugars (e.g., xylose) associated  
20 with biomass hydrolysates are poorly understood, making it difficult to control and engineer in *Y.*  
21 *lipolytica*. To fill this knowledge gap, we analyzed the genetic diversity of five undomesticated *Y.*  
22 *lipolytica* strains and identified singleton genes and genes exclusively shared by strains exhibiting  
23 desirable phenotypes. Strain characterizations from controlled bioreactor cultures revealed that the  
24 undomesticated strain YB420 used xylose to support cell growth and maintained high lipid levels  
25 while the conventional strain CBS7504 degraded cell biomass and lipids when xylose was the sole  
26 remaining carbon source. From proteomic analysis, we identified carbohydrate transporters,  
27 xylose metabolic enzymes and pentose phosphate pathway proteins stimulated during the xylose  
28 uptake stage for both strains. Furthermore, we distinguished proteins in lipid metabolism (e.g.,  
29 lipase, NADPH generation, lipid regulators,  $\beta$ -oxidation) activated by YB420 (lipid maintenance  
30 phenotype) or CBS7504 (lipid degradation phenotype) when xylose was the sole remaining carbon  
31 source. Overall, the results relate genetic diversity of undomesticated *Y. lipolytica* strains to  
32 complex phenotypes of superior growth, sugar utilization, lipid accumulation and degradation in  
33 biomass hydrolysates.

34

## 35 **IMPORTANCE**

36 *Yarrowia lipolytica* is an important industrial oleaginous yeast due to its robust phenotypes for  
37 effective conversion of inhibitory lignocellulosic biomass hydrolysates into neutral lipids. While  
38 lipid accumulation has been well characterized in this organism, its interconnected lipid  
39 degradation phenotype is poorly understood during fermentation of biomass hydrolysates. Our  
40 investigation into the genetic diversity of undomesticated *Y. lipolytica* strains, coupled with  
41 detailed strain characterization and proteomic analysis, revealed metabolic processes and  
42 regulatory elements conferring desirable phenotypes for growth, sugar utilization, and lipid  
43 accumulation in undetoxified biomass hydrolysates by these natural variants. This study provides  
44 a better understanding of the robust metabolism of *Y. lipolytica* and suggests potential metabolic  
45 engineering strategies to enhance its performance.

46

47 **Key words:** bioreactor characterization, proteomic analysis, xylose metabolism, xylose  
48 transporters, lipid accumulation, lipid degradation, lipid regulators.

## 49 INTRODUCTION

50 *Yarrowia lipolytica* is an important oleaginous yeast for industrial biotechnology. Wildtype  
51 strains can accumulate a remarkable 40% of cell weight in neutral lipids from lignocellulosic  
52 biomass or agricultural wastes (1). These microbial lipids are a promising alternative to petroleum  
53 and animal oils for the sustainable production of advanced fuels and oleochemicals. In addition,  
54 *Y. lipolytica* is exceptionally robust to chemical inhibitors and stressful environments, which are  
55 critical biocatalyst properties to achieve sustainable production of chemicals from low-cost  
56 biomass feedstocks. It can tolerate broad pH ranges (2), high salt concentrations (3), and organic  
57 solvents (e.g., ionic liquids) (4, 5); in fact, most *Y. lipolytica* isolates exhibit robust growth in up  
58 to 60% (v/v) undetoxified dilute acid-pretreated switchgrass hydrolysates that are normally  
59 inhibitory to microbes (6). Thus, a better understanding of the mechanisms that underpin *Y.*  
60 *lipolytica*'s natural robustness would not only enable development of niche strains for novel  
61 biocatalysis but would also provide fundamental knowledge that may be applied to other  
62 industrially-relevant organisms.

63 Recently, significant research has focused on manipulating the metabolism of the  
64 conventional laboratory strain CBS7504 (W29), isolated from a Paris sewer and well domesticated  
65 in laboratory (7), for enhanced lipid production and utilization of pentose (e.g., xylose) and hexose  
66 (e.g., glucose) sugars in inhibitory lignocellulosic biomass hydrolysates. To increase lipid  
67 production in *Y. lipolytica*, numerous metabolic engineering strategies have been implemented that  
68 successfully redirected carbon flux to lipid metabolism (8) including overexpression of lipid  
69 biosynthesis enzymes (9) and/or disruption of the competitive  $\beta$ -oxidation pathway (10) and  
70 altered expression of regulators (e.g., SNF1) of lipid accumulation (11). The most lipogenic *Y.*  
71 *lipolytica* strain reported to date achieved 90% lipid content by simultaneous restoration of leucine

72 and uracil biosynthesis, overexpression of diacylglycerol transferase (DGA1), deletion of  
73 peroxisome biogenesis enzyme peroxin-10 (PEX10), deletion of multifunctional  $\beta$ -oxidation  
74 enzyme (MFE1), and optimization of culture conditions (12).

75 To maximize lipogenesis from biomass hydrolysates requires efficient utilization of both  
76 hexose and pentose sugars. *Y. lipolytica* does not efficiently use xylose as a sole carbon source,  
77 albeit it processes genes for the complete xylose catabolic pathway (13). Activation of this cryptic  
78 pathway has been accomplished through adaptive evolutionary approaches resulting in improved  
79 xylose utilization (14). Furthermore, overexpression of endogenous xylose catabolic genes (15-  
80 17) and heterologous expression of xylose reductase and xylitol dehydrogenase from  
81 *Scheffersomyces stipitis* (17, 18) have successfully increased xylose consumption rates. Several  
82 transporters have also been identified in *Y. lipolytica* showing increased expression levels during  
83 xylose assimilation and combinatorial overexpression of the endogenous xylitol dehydrogenase  
84 with several of these transporters has also achieved improved growth on xylose (19). While the  
85 production phenotypes are well characterized, fundamental understanding of complex phenotypes  
86 responsible for superior growth, sugar utilization, and lipid accumulation — or degradation —  
87 during fermentation of biomass hydrolysates are still lacking.

88 Complementary to these engineering efforts, recent investigation into the genetic diversity  
89 of undomesticated *Y. lipolytica* strains revealed emergent robust phenotypes not present in the  
90 conventional strain CBS7504. Characterization of fifty-seven undomesticated *Y. lipolytica* isolates  
91 on inhibitory undetoxified biomass hydrolysates revealed select strains with enhanced growth,  
92 lipid production, and pentose-sugar assimilation relative to CBS7504 (6). In this study, *Y.*  
93 *lipolytica*'s natural genetic diversity is further explored using a combination of detailed strain  
94 characterization and proteomic analysis. Coupled together, these analyses uncover the underlying

95 mechanisms behind these poorly understood complex phenotypes during fermentation of biomass  
96 hydrolysates. The results presented here will aid engineering efforts to better control lipid  
97 accumulation or degradation phenotypes for optimally producing advanced biofuels and/or  
98 oleochemicals from biomass hydrolysates.

## 99 **RESULTS**

### 100 **Comparative genomics reveals unique genotypes of undomesticated *Yarrowia* strains**

101 *Phylogenetic tree of Y. lipolytica isolates shows close similarity between genomes.*

102 Phylogenetic species analysis distinguished the first evolutionary split dividing the *Yarrowia* clade  
103 into two ancestral roots (Figure 1A). The first root contained the undomesticated YB419 and the  
104 conventional strains CBS7504 and CLIB122 (a species crossed between CBS7504 and CBS6124-  
105 2 (7)). The second root contained the remaining four non-conventional isolates, depicting YB392  
106 and YB420 as the most divergent from YB567 followed by YB566. This result was surprising  
107 since YB392, YB419 and YB420 were all isolated from corn milling plants within Illinois (20).  
108 Interestingly, the closest related species to the *Yarrowia* clade is *Sugiyamaella lignohabitans*, an  
109 efficient pentose utilizing and facultative anaerobic yeast (21).

110 *Undomesticated Y. lipolytica isolates contain unique genes not found in conventional*

111 *strains.* The undomesticated strains were characterized for unique genes that may contribute to  
112 their distinctive phenotypes. A singleton gene signifies a gene appearing exclusively in one of the  
113 genomes within the pangenome (i.e., conventional strains CBS7504 and CLIB122;  
114 undomesticated strains YB392, YB419, YB420, YB566 and YB567). Of the undomesticated *Y.*  
115 *lipolytica* strains, YB419 contained the most singletons (23 genes) followed by YB420 (17 genes),  
116 while the remaining 3 isolates contained 5 or fewer singletons (Figure 1B, Table S1). Two of the  
117 undomesticated strains YB566 and YB567, exhibiting better xylose assimilation from switchgrass

118 hydrolysates (SGH) (6), exclusively share 10 genes not found in other three strains. (Figure 1B,  
119 Table S2). Likewise, six genes are exclusively shared among the undomesticated strains YB392,  
120 YB419 and YB420, exhibiting better lipid accumulation (Figure 1B, Table S3) (6).

121 ***Y. lipolytica* strains of different origins thrive in undetoxified biomass hydrolysates and**  
122 **exhibit distinct phenotypes.** To better understand how the genetic diversity influences the robust  
123 phenotypes in cell growth, mixed sugar co-utilization, and lipid accumulation, we characterized  
124 CBS7504 (Figure S1), YB392 (Figure S2), YB419 (Figure S3), YB420 (Figure S4), YB566  
125 (Figure S5) and YB567 (Figure S6) in 50% (v/v) undetoxified biomass hydrolysates. Unlike the  
126 previous studies (6), we characterized these strains in computer-controlled bioreactors (Figure 2A).  
127 In general, all strains grew well in undetoxified biomass hydrolysates. However, there were  
128 distinct phenotypes among strains associated with cell growth, mixed sugar co-utilization, and  
129 lipid accumulation. Here, two representative *Y. lipolytica* strains, CBS7504 and YB420, were  
130 selected for in-depth analysis due to their distinctive differences in xylose and lipid metabolism  
131 and members of two different ancestral roots.

132 The conventional *Y. lipolytica* strain CBS7504 grew well in undetoxified biomass  
133 hydrolysates, achieving maximum cell mass ( $39.3 \pm 3.3$  OD<sub>600nm</sub>) within 28 hours of  
134 fermentation from the co-utilization of  $2.90 \pm 0.05$  (% w/v) glucose and  $0.80 \pm 0.03$  (% w/v) xylose  
135 (Figure 2B). Lipids accumulated during growth, reaching a maximum of  $2.10 \pm 0.60$  g/L at 21  
136 hours into the fermentation (Figure 2D). Upon glucose exhaustion, cell mass and accumulated  
137 lipid levels steadily declined for the remaining 48 hours of fermentation despite the continued  
138 consumption of xylose. At 72 hours of fermentation, CBS7504 consumed a total of  $2.10 \pm 0.02$   
139 (% w/v) xylose and produced  $0.91 \pm 0.01$  (% w/v) xylitol (yielding  $0.44 \pm 0.00$  xylitol/xylose). The  
140 undomesticated *Y. lipolytica* strain YB420 also grew robustly in undetoxified biomass

141 hydrolysates but showed contrasting phenotypes with CBS7504. Over 45 hours of fermentation,  
142 YB420 showed less co-utilization of glucose ( $2.80 \pm 0.03$  [% w/v]) and xylose ( $0.40 \pm 0.03$  [% w/v])  
143 and less lipid production ( $1.6 \pm 0.5$  g/L) than CBS7504 (Figure 2C and E). However, upon glucose  
144 depletion, YB420 maintained cell mass and lipids while consuming a total of  $2.1 \pm 0.01$  (% w/v)  
145 xylose and producing  $0.61 \pm 0.04$  (% w/v) xylitol (yielding  $0.30 \pm 0.006$  xylitol/xylose). The  
146 differences observed in xylose utilization to support maintenance of lipids and cell growth  
147 prompted a systems-level comparison between the two strains CBS7504 and YB420.

#### 148 **Proteomic analysis reveals key processes impacting sugar utilization and lipid degradation**

149 *Proteome alterations in growth stages.* Proteomic samples were collected during the  
150 exponential growth phase when glucose was assimilated (S1 and S2) and stationary phase when  
151 xylose was assimilated (S3 and S4) for both strains in biomass hydrolysate cultures. Differences  
152 in protein abundances were compared for S2, S3 and S4 against S1 for each strain (Figure 3A, 3B,  
153 3D and 3E). As expected, there were only minor proteome differences between glucose  
154 assimilation phase samples (S1 and S2) (Figure 3A, 3D). However, *Y. lipolytica* strains  
155 dramatically altered their proteomes during stationary phase samples (samples S3 and S4) when  
156 xylose was assimilated, and lipid levels were maintained by YB420 but degraded by CBS7504  
157 (Figure 3B, 3E). For CBS7504, 673 protein abundances changed throughout the stationary phase  
158 (samples S3 and S4) (Figure 3C) while 800 protein abundances were changed in YB420 (Figure  
159 3F). Since the largest proteome differences were found between exponential (S1 and S2) and  
160 stationary (S3 and S4) phase samples, we chose to characterize xylose assimilation and lipid  
161 degradation phenotypes using proteins with significant changes in abundance at S3 and/or S4  
162 relative to S1.



163           ***Proteome alterations in xylose assimilation.*** CBS7504 consumed xylose slightly faster  
164 than YB420 but converted more of it into xylitol ( $0.44 \pm 0.002$  %w/w of xylose) rather than  
165 maintaining cell mass or lipid content (Figure 2B, 2C). This led us to investigate protein  
166 abundances in the pentose phosphate pathway (PPP) where xylose is introduced into central  
167 metabolism. Despite the quick assimilation of xylose, during xylose assimilation (S3 and S4)  
168 CBS7504 only upregulated the protein abundance of transketolase (TKL, YALI0D02277g) in the  
169 PPP (Figure 4A, Table S4). Interestingly, CBS7504 downregulated the protein abundance of  
170 ribose-phosphate pyrophosphokinase (PRS1, YALI0B13552g) which converts ribose-5-phosphate  
171 into 5-phosphoribosyl 1-pyrophosphate (PRPP) to feed downstream biosynthetic pathways (i.e.,  
172 histidine, pyrimidine and purine metabolism) associated with cell growth, correlating with the  
173 decreased cell mass, increased xylitol production and lipid degradation phenotypes of CBS7504.  
174 Meanwhile, during xylose assimilation (S3 and S4) YB420 produced less xylitol ( $0.30 \pm 0.006$   
175 %w/x of xylose) and maintained cell mass and lipid content (Figure 2C). Regarding the PPP, six  
176 proteins were upregulated and none downregulated in YB420 during the stationary phase (Figure  
177 4B, Table S4). Not surprisingly, these upregulated proteins include xylitol dehydrogenase (Xyl2,  
178 YALI0E12463g) and xylulokinase (Xyl3, YALI0F10923g) which together convert xylitol into  
179 xylulose-5P. Notably, YB420 also upregulated 2 proteins annotated (in panther database) for  
180 xylulose kinase (YALI0D15114g) and ribulokinase (YALI0E13321g) activities. Additionally,  
181 YB420 increased the protein abundance of D-arabinitol 2-dehydrogenase (ADH,  
182 YALI0F02211g).

183           ***Transporters.*** In total, 87 transporters were identified with statistically significant  
184 abundance changes when comparing stationary phase (S3 and/or S4) to exponential growth phase  
185 (S1) (Figure 4C, Table S4). While most are annotated for ion and inorganic molecular entity

186 transmembrane transport activities, we focused on the 28 active transmembrane transporters to  
187 identify those with altered protein abundances during xylose assimilation. Specifically, six of these  
188 transporters are annotated with carbohydrate transmembrane transporter activity and have been  
189 studied for xylose assimilation in *Y. lipolytica* (Figure 4D) (14). YALI0C06424g is a carbohydrate  
190 symporter with the largest increase in abundance for both strains. This protein is similar to Snf3p  
191 and Rgt2p proteins of *Saccharomyces cerevisiae* that are involved in glucose sensing and signaling  
192 as well as fructose and mannose transport (22). Both CBS7504 and YB420 strains also increased  
193 the abundance of YALI0F06776g, an observation that is in agreement with previous  
194 transcriptomics data measuring *Y. lipolytica*'s growth response to xylose as the sole carbon source  
195 (14). Though these two transporters exhibited similar upregulation patterns during growth on  
196 xylose across both strains, albeit with varied magnitudes, other transporters were more strain  
197 specific: YALI0D00363g, YALI0F25553g, and YALI0C04730g. YALI0D00363g was strongly  
198 upregulated in S4 for CBS7504, but not in YB420, while YB420 increased the protein abundance  
199 of YALI0F25553g at both S3 and S4 and YALI0C04730g S3 but not in CBS7504. Interestingly,  
200 individual overexpression of these 3 carbohydrate symporters (YALI0D00363g, YALI0F25553g  
201 or YALI0C04730g) supported growth on plates containing xylose as the sole carbon source (19).  
202 Lastly, YALI0D01111g was downregulated in CBS7504 during xylose assimilation S3 and S4 and  
203 at S4 in YB420.

204 ***Proteome alterations in lipid metabolism.*** CBS7504 demonstrated lipid degradation while  
205 YB420 maintained lipid content during the stationary/xylose assimilation growth stage samples  
206 (S3 and/or S4) (Figures 2D, 2E, and 5A). To understand the cause of lipid  
207 degradation/maintenance, we compared proteins involved in fatty acid degradation and  
208 triacylglycerol (TAG) metabolism. In the TAG synthesis pathway, CBS7504 increased the

209 abundance of both bifunctional glycerol-3-phosphate/glycerone-phosphate O-acyltransferase  
210 (SCT1, YALIO00209g), converting glycerol-3-phosphate (gly-3P) into lysophosphatidic acid  
211 (LPA), and acyl-CoA dependent diacylglycerol acyltransferase I (DGA1, YALIOE32769g), which  
212 converts diacylglycerol (DAG) into TAG (Figure 5B, Table S5). Likewise, YB420 increased the  
213 of abundance DGA1, but also lysophosphatidate acyltransferase (ALE1, YALIOF19514g) and  
214 phosphatidic acid phosphohydrolase (PAP, YALIOD27016g), which together convert LPA into  
215 TAG (Figure 5C, Table S5). However, YB420 downregulated the abundance of diacylglycerol  
216 diphosphate phosphatase/phosphatidate phosphatase (LPP1, YALIOB14531g) which has the same  
217 metabolic function as PAP (KEGG E.C.3.1.3.4).

218         Considering the  $\beta$ -oxidation pathway, both strains showed increased protein abundance of  
219 acyl-coenzyme A oxidases 1 (POX1, YALIOE32835g), 2 (POX2, YALIOF10857g), and 6 (POX6,  
220 YALIOE06567g) and multifunctional  $\beta$ -oxidation protein (MFE1, YALIOE15378g) (Figure 5A,  
221 5B). However, CBS7504 also showed increased abundance of POX3 (YALIOD24750g), POX4  
222 (YALIOE27654g) and 3-oxyacyl-thiolase (POT1, YALIOE18568g), all involved in the breakdown  
223 of TAGs into free fatty acids (FFA). Both strains decreased the abundance of acetyl-CoA  
224 carboxylase (ACC1, YALIOC11407g) but CBS7504 also decreased abundance of fatty acid  
225 synthase subunit 1 (FAS1, YALIOB15059g). Interestingly, YB420 increased the abundance of  
226 malic enzyme (ME, YALIOE18634g), which generates NADPH pools that are required for the  
227 FAS complex in oleaginous organisms (23), but shows little to no involvement in lipid production  
228 in *Y. lipolytica* (24-26).

229         **Lipase.** In total, ten lipases were identified with statistically significant abundance changes  
230 during the stationary phase (S3 and/or S4) relative to exponential growth phase (S1) (Figure 5B,  
231 5C; Table S5). While none include the well-studied triacylglycerol lipase 3 (TGL3,

232 YALI0D17534g) or TLG4 (YALI0F10010g), four of the identified lipases are annotated for TGL  
233 activity (PTHR23025). Interestingly, CBS7504 increased the protein abundance of all four TGLs  
234 in stationary phase while YB420 only increased the protein abundance of one.

235 ***NADPH generation.*** We identified five differentially abundant proteins involved in the  
236 generation of NADPH, the reducing equivalent required to sustain fatty acid synthesis (Figure 5B,  
237 C; Table S5). While both YB420 and CBS7504 strains increased the protein abundance of sorbitol  
238 dehydrogenase (MnDH1, YALI0B16192g) during stationary phase. Only YB420 increased  
239 abundances of the other 4 proteins including malic enzyme (ME, YALI0E18634g), succinate  
240 semialdehyde dehydrogenase (UGA2, YALI0F26191g), 6-phosphogluconolactonase (SOL3,  
241 YALI0E11671g) and NADP-dependent glucose-6-phosphate dehydrogenase (ZWF1,  
242 YALI0E22649g).

243 ***Regulators of lipid synthesis.*** Nitrogen limitation (i.e., high carbon to nitrogen ratio) is a  
244 common strategy to increase lipid synthesis from glucose (27), and numerous studies have reported  
245 regulators of lipid accumulation and genes affected by nitrogen limitation. Our analysis identified  
246 eight of these regulators with statistically significant abundance changes during the stationary  
247 phase (S3 and/or S4) relative to exponential growth phase (S1) – all of which have been previously  
248 reported to influence lipid accumulation (11, 28, 29). Of these, YB420 increased the protein  
249 abundance of HLH transcription factor YAS2 (YALI0E32417g), a subunit of the SWI/SNF  
250 chromatin remodeling complex POR1 (YALI0D12628g), AMP-activated serine/threonine protein  
251 kinase SNF1 (YALI0D02101g) and heat shock transcription factor HSF1 (YALI0E13948g)  
252 (Figure 5C, Table S5). Meanwhile, CBS7504 increased the protein abundance of cytoplasmic pre-  
253 60S factor REI1 (YALI0B08734g) and decreased the protein abundance of a zinc finger protein

254 (YALIOE30789g), sterol regulatory element binding protein UPC2 (YALIOB15818g) and SNF1-  
255 activating kinase 1 SAK1 (YALIOD08822g) (Figure 5B, Table S5).

256 ***Proteome alterations in regulatory elements.*** In total, 46 gene-specific regulator proteins  
257 (from panther and TFDB) were identified with statistically significant abundance changes during  
258 the stationary phase (S3 and/or S4) relative to exponential growth phase (S1) (Figure 6, Table S6).  
259 Thirteen of these regulatory proteins had significant changes in both CBS7504 and YB420 (Figure  
260 6). The protein with the largest increase in abundance, YALIOC07821g, is annotated as glucose  
261 transport transcription regulator RGT1-related (PTHR31668) but only has the conserved domain,  
262 GAL4 (smart00066) with *S. cerevisiae* RGT1p. Interestingly, four of these regulatory proteins  
263 have distinct, strain specific abundance patterns: RFX1, ASG1, STP1, and FHL1. RFX1,  
264 regulatory factor X in *S. cerevisiae*, is a major transcriptional repressor of DNA-damage-regulated  
265 genes (30). ASG1, an activator of stress-related genes, activates genes in  $\beta$ -oxidation,  
266 glucogenesis, glyoxylate cycle, triacylglycerol breakdown, peroxisomal transport, and helps  
267 assimilate fatty acids in *S. cerevisiae* (31). STP1, involved in species-specific tRNA processing,  
268 activates transcription of amino acid permease genes and is directly involved in pre-tRNA splicing  
269 in *S. cerevisiae* (32, 33). Finally, FHL1 (fork-head like) in *S. cerevisiae* functions as a transcription  
270 regulator of ribosomal protein transcription (34).

271

## 272 **DISCUSSION**

273 Lipid accumulation and lipid degradation patterns from cultures fermenting non-preferred  
274 sugars prevalent in biomass hydrolysates (i.e., xylose) are complex phenotypes making them  
275 difficult to control and engineer in *Y. lipolytica* (15, 35, 36). By comparing proteomes of natively  
276 robust undomesticated *Y. lipolytica* strain YB420 with the conventional strain CBS7504, we

277 identified key proteins supporting cell growth and lipid accumulation with xylose as the sole  
278 remaining carbon source.

279         Once all the glucose was consumed, YB420 continued to accumulate lipids and sustained  
280 cell mass from xylose, while CBS7504 degraded lipids, decreased cell mass and produced more  
281 xylitol (Figure 2). This more efficient use of xylose, demonstrated by YB420, is supported by the  
282 greater number of PPP proteins upregulated during xylose assimilation, including Xyl2 and Xyl3  
283 which are critical for flux of xylose through the PPP (Figure 4B). Meanwhile, the almost  
284 unchanged abundances of proteins found in CBS7504 in the PPP agree with the increased xylitol  
285 secretion, decreased cell mass and lipid degradation phenotypes observed (Figure 4A).  
286 Interestingly, both strains showed similar xylose uptake profiles despite varying cell mass and lipid  
287 profiles. This suggests that transporters YALI0C06424g and YALI0F06776g are likely  
288 responsible and/or specific for xylose uptake, as indicated by increased protein abundances for  
289 both transporters across each strain only during the xylose assimilation phase (Figure 4D).

290         In lipid metabolism, YB420 increased proteins involved in TAG biosynthesis while  
291 CBS7504 increased proteins involved in  $\beta$ -oxidation and TAG lipase activity, strongly supporting  
292 the lipid maintenance and lipid degradation phenotypes of YB420 and CBS7504, respectively  
293 (Figure 5). Accordingly, YB420 increased the abundance of NADPH-generating enzymes which  
294 supply critical reducing-equivalents for lipid synthesis and xylose assimilation, including SOL3,  
295 ZWF1, ME and UGA2. Previously, overexpression of SOL3 increased lipid yield, titer and  
296 content (29). SOL3 does not produce NADPH directly, but instead catalyzes the intermediate  
297 reaction of the oxidative PPP that feeds into NADPH-producing enzymes, ZWF1 and NADP+-  
298 dependent 6-phosphogluconate dehydrogenase (29). Additionally, the promoters of ZWF1 along  
299 with ME and UGA2 exhibited increased expression levels in response to nitrogen limitation, a

300 condition which results in increased lipid accumulation (26). Taken together, the increased protein  
301 abundance of NADPH-producing enzymes supports the lipid maintenance phenotype observed by  
302 YB420.

303         Several regulators previously reported to influence lipid accumulation in *Y. lipolytica* were  
304 captured by the proteomic analysis. Of these, YB420 cultures showed increased protein  
305 abundances of YAS2, POR1, SNF1 and HSF1. In a previous report, overexpression of YAS2 did  
306 not increase lipid accumulation in glucose minimal media but did significantly increase lipogenesis  
307 when acetate was the sole carbon source, suggesting indirect involvements in lipid biosynthesis in  
308 *Y. lipolytica* (29). Overexpression of POR1 in *Y. lipolytica* resulted in ~18% increased lipid  
309 content in glycerol media but showed growth defects in glucose media (28). Conversely, deletion  
310 of SNF1 was reported to increase fatty acid accumulation without the need for nitrogen limitation  
311 (11) and overexpression of HSF1 resulted in decreased lipid accumulation with glycerol as the  
312 sole carbon source (28). We also identified one regulator (REI1) with increase protein abundance  
313 and three regulators (YALI0E30789g, SAK1 and UPC2) with decreased abundance by CBS7504  
314 during lipid degradation. Previously, overexpression of UPC2 decreased lipid accumulation while  
315 overexpression of YALI0E30789g and REI1 increased lipid accumulation, which does not support  
316 the lipid degradation phenotype of CBS7504 in our study (28). Furthermore, deletion of SAK1  
317 has been shown to result in increased fatty acid content (11) but in our study, decreased SAK1  
318 protein levels were accompanied by lipid degradation in CBS7504.

319         While some unique genes between CBS7504 and YB420 were discovered by comparative  
320 genomics, our proteomic analysis did not identify any of them associated with the xylose or lipid  
321 metabolic phenotypes observed. This evokes the question: what underlying genotypes are causing  
322 differences in these phenotypes? While our proteomic analysis suggests regulation plays a

323 significant role in affecting the phenotypes of the strain variants, future investigation should  
324 illuminate alterations in genome arrangement, epigenetics, and/or variants in promoter regions that  
325 could cause phenotypic divergence between CBS7504 and YB420.

326 In conclusion, our study highlights the regulation machinery of pentose and lipid  
327 metabolism in *Y. lipolytica* variants is complex and multifaceted, with many aspects remaining to  
328 be discovered and elucidated. Our characterization of *Y. lipolytica* isolates with phenotypic and  
329 genetic diversity, however, sheds light on those proteins supporting lipid accumulation or  
330 degradation during fermentation of non-preferred biomass sugar xylose, useful for targeted strain  
331 engineering for effective conversion of biomass hydrolysates to fuels and chemicals.

332

## 333 **MATERIALS AND METHODS**

### 334 **Strains**

335 *Y. lipolytica* strains CBS7504, YB392, YB419, YB420, YB566 and YB567 were used. CBS7504  
336 is from CBS-KNAW Culture Collection in Utrecht, the Netherlands. All other strains are from  
337 ARS (NRRL) Culture Collection, Peoria, IL. The strains were stored in 20% glycerol at -80°C.

### 338 **Medium and culturing conditions**

339 ***Switchgrass hydrolysate preparation.*** Liberty switchgrass, that had been pelleted and cut  
340 with a 4mm knife mill, was used. The biomass was hydrolyzed at 20% solids w/w (6). A 20-gram  
341 dry weight of biomass was added to stainless steel vessels. Then 80 mL of 0.936 % sulfuric acid  
342 w/ 3.72 g/L Pluronic F-68 was added to each vessel. Eleven vessels per oven run were filled. The  
343 12<sup>th</sup> vessel was filled with 80 mL of water and contained the thermocouple. The vessels were  
344 placed in a Mathis Labomat Infrared Oven. The following settings were used for the program:



345 Temperature = 160°C, Heat Ramp = 2.6°C, Mix settings = 50 rpm, 60 seconds to the left and 60  
346 seconds to the right, and cooling temperature = 40°C. Once the vessels have cooled, 4.0 mL of  
347 1.0 M citrate buffer was added to each vessel. Then pH of the pretreated biomass was adjusted to  
348 4.5-5.0 with 30% calcium hydroxide. The vessels were placed back in the Mathis oven for mixing  
349 at room temperature. The contents of 11 vessels were transferred to a Fernbach flask with a solid  
350 rubber stopper. The following enzymes were added: 29.7 mL Cellic Ctec3 and 5.5 mL Cellic NS-  
351 22244. The Fernbach was incubated at 50°C with shaking at 125 rpm for 3 days. After 3 days the  
352 solids were removed using a 0.2 µm filter unit. The liquid fraction was stored at 4°C. Multiple  
353 batches were made over the course of a week. The batches were pooled. The liquid was then pH  
354 adjusted to 6.0 using 10N sodium hydroxide. After pH adjustment the SGH was filter sterilized  
355 and frozen at -20°C until week of use. The SGH was thawed at 4°C overnight. Prior to use, it was  
356 amended to a whole hydrolysate with 2.31 g/L (NH<sub>4</sub>)<sub>2</sub>SO<sub>4</sub>, 1.81g/L Difco vitamin assay casamino  
357 acids, 0.018 g/L DL-tryptophan, and 0.072 g/L L-cysteine, and then diluted to 50% v/v with water.  
358 The diluted and amended hydrolysate is referred to 50% SGH form here on.

359 ***Culturing conditions.*** The yeast stocks were streaked on YPD Agar plates and incubated  
360 at 28°C for 24-48 hours. The plates were stored at 4°C until use. YPD media, 2 mL in a 16 mL  
361 tube, was inoculated by loop for pre-seed cultures. Pre-seed cultures were incubated at 28°C with  
362 shaking at 250 rpm for 18 hours. 0.5 mL of pre-seed culture was transferred to 10 mL 50 % SGH  
363 in 50 mL baffled flasks for seed cultures. Seed cultures were incubated 24 hours at 28°C with 250  
364 rpm. The seed cultures were centrifuged to remove supernatant and resuspended in sterile water  
365 to A<sub>600</sub> = 50. 150 mL of 50% SHG was inoculated at an A<sub>600</sub> = 0.75. DasGip DasBox bioreactors  
366 were used for experimental cultures. Each strain was inoculated in triplicate. The following  
367 settings were used for the bioreactors: Beginning volume = 150 mL; Vessel = 250 mL;

368 Temperature = 28°C; pH Set Point = 6.0; Agitation = 900 rpm; Aeration = 9.0 L/h; Base/Acid  
369 control: use 2 M HCl and 2 M NaOH for automatic dosing; Data Collection = dissolved oxygen,  
370 temperature, and pH. Cognis Clerol FBA 3107 antifoam was used to control foaming. After  
371 inoculation, 200uL of antifoam was added to each vessel. Antifoam was then added by pipet as  
372 need for duration of culture growth. A 1.2 – 1.5mL sample was taken for A600, residual sugars  
373 and lipids 3 times a day. A 1.0mL aliquot was removed from each sample for residual sugars and  
374 lipid analysis. The 1.0mL aliquot was centrifuged to remove the supernatant for residual sugar  
375 analysis. The cell pellet was washed twice with deionized water and resuspended up to 1.0mL with  
376 water. The samples were frozen at -20°C until analysis. The remaining sample was diluted for A  
377 <sub>600</sub> measurement. Duplicate samples (2.0 mL) for proteomic analysis were taken once the OD  
378 reaches <4.0, 2-3 hours later, at 44-48 hours and a final sample at 68-72 hours. Samples were kept  
379 cold while processing. The samples were centrifuged to remove supernatant, washed with 1.0mL  
380 of chilled water and then centrifuged again to remove water. The washed cell pellets were the  
381 stored at -80°C.

## 382 **Analytical methods**

383 ***Lipid quantification.*** Lipid analysis was done using a sulfo-phospho-vanillin colorimetric  
384 assay as previously reported by Dien *et al.* (37) For each sample, 1.0mL of sulfuric acid was added  
385 to a glass tube and 50 µL of sample (diluted with water if needed). The tube was heated at 100°C  
386 in a dry bath for 10 minutes. After heating, the tubes were cooled in a room temp water bath for  
387 10 minutes. Once cooled, 2.5 mL of the vanillin-phosphoric acid solution was added to each tube.  
388 The tubes were mixed and placed in a 37°C incubator for 15 minutes. They are then cooled in a  
389 room temperature water bath. The absorbance is then measured at 530 nm. The Vanillin-  
390 phosphoric acid solution (0.12g vanillin, 20 mL water, and 80 mL 85% o-phosphoric acid) is made

391 fresh daily for assays. A blank with 50 $\mu$ L water and four calibration standards are used for the  
392 standard curve. The calibration standards are dilutions of corn oil dissolved in 2:1 (v/v)  
393 chloroform/methanol and 50  $\mu$ L of each standard was processed in duplicate along with the  
394 samples.

395 ***Metabolites and sugar quantification.*** Residual sugars were measured on a Thermo High-  
396 Performance Liquid Chromatography system. The system used a Biorad HPX-87H column and a  
397 refractive index detector. The column was kept at 65°C with 0.6mL/min of 5mM sulfuric acid as  
398 a mobile phase.

399 ***LC/MS for proteomic analysis.*** *Y. lipolytica* cells harvested at the time points detailed  
400 above were resuspended in 100 mM Tris-HCl, 10 mM dithiothreitol, pH 8.0 and bead beat with  
401 0.5 mm zirconium oxide beads in a Geno/Grinder® 2010 (SPEX SamplePrep) for 5 min at high  
402 speed (1750 rpm). Samples were adjusted to 4% SDS and incubated at 95°C for 10 min. Crude  
403 lysate was then cleared via centrifugation (21,000 x g) and quantified by corrected absorbance  
404 (Scopes) at 205 nm (NanoDrop OneC; Thermo Fisher). Samples were then treated with 30 mM  
405 iodoacetamide for 20 min at room temperature in the dark. Three hundred micrograms of crude  
406 protein were then processed by protein aggregation capture (PAC) (38). Briefly, 300  $\mu$ g of  
407 magnetic beads (1 micron, SpeedBead Magnetic Carboxylate; GE Healthcare UK) was suspended  
408 in each sample and protein aggregation was induced by adjusting the sample to 70% acetonitrile.  
409 Aggregated proteins were then washed with 1 mL of neat acetonitrile followed by 70% ethanol,  
410 and aggregated protein pellet digested with 1:75 (w/w) proteomics-grade trypsin (Pierce) in 100  
411 mM Tris-HCl, pH 8.0 overnight at 37°C and again for 4 h the following day. Tryptic peptides  
412 released from the beads were then acidified to 0.5% formic acid, filtered through a 10 kDa MWCO  
413 spin filter (Vivaspin500; Sartorius), and quantified by NanoDrop OneC.

414 Peptide samples were analyzed by automated 1D LC-MS/MS analysis using a Vanquish  
415 UHPLC plumbed directly in-line with a Q Exactive Plus mass spectrometer (Thermo Scientific)  
416 outfitted with a trapping column coupled to an in-house pulled nanospray emitter as previously  
417 described (39). The trapping column (100  $\mu\text{m}$  ID) was packed with 10 cm of 5  $\mu\text{m}$  Kinetex C18  
418 RP resin (Phenomenex) while the nanospray emitter (75  $\mu\text{m}$  ID) was packed with 15 cm of 1.7  $\mu\text{m}$   
419 Kinetex C18 RP resin. For each sample, 3  $\mu\text{g}$  of peptides were loaded, desalted, and separated by  
420 uHPLC with the following conditions: sample injection followed by 100% solvent A (95%  $\text{H}_2\text{O}$ ,  
421 5% acetonitrile, 0.1% formic acid ) chase from 0-30 min (load and desalt), linear gradient 0% to  
422 30% solvent B (70% acetonitrile, 30% water, 0.1% formic acid) from 30-220 min (separation),  
423 and column re-equilibration at 100% solvent A from 220-240 min. Eluting peptides were measured  
424 and sequenced by data-dependent acquisition on the Q Exactive MS as previously described (40).

#### 425 **Bioinformatics and data analysis**

426 *Comparative genomics.* The following genome assemblies of *Y. lipolytica* strains were  
427 downloaded from NCBI as genbank files: CBS7504/CLIB89/W29 (GCA\_001761485.1),  
428 CLIB122 (GCA\_000002525.1), YB392 (GCA\_003367865.1), YB419 (GCA\_003367925.1),  
429 YB420 (GCA\_003367965.1), YB566 (GCA\_003367945.1) and YB567 (GCA\_003367845.1).  
430 These were imported individually into a KBase narrative as genomes and combined into a genome  
431 set using the Build GenomeSet v1.0.1 application. A phylogenetic tree was constructed using  
432 Insert Set of Genomes Into Species Tree 2.1.10 application with neighbor public genome count of  
433 20. Orthologue genes and unique genes shared between isolates were identified with the Compute  
434 Pangenome application using the genome set of the 7 isolates as the input. Finally, Pangenome  
435 Circle Plot - v1.2.0 application was used to produce a list of singleton genes for each base genome  
436 identified from the pangenome.

437           **Proteomics.** MS/MS spectra were searched against the *Y. lipolytica* CLIP122 proteome  
438 (UniProt; Nov18 build) appended with non-redundant proteins from strain YB-420 and common  
439 protein contaminants using the MS Amanda v.2.0 algorithm in Proteome Discoverer v.2.3  
440 (ThermoScientific). Peptide spectrum matches (PSM) were required to be fully tryptic with 2  
441 miscleavages; a static modification of 57.0214 Da on cysteine (carbamidomethylated) and a  
442 dynamic modification of 15.9949 Da on methionine (oxidized) residues. Peptide spectrum matches  
443 (PSM) were scored and filtered using the Percolator node in Proteome Discoverer and false-  
444 discovery rates initially controlled at < 1% at both the PSM- and peptide-levels. Peptides were then  
445 quantified by chromatographic area-under-the-curve, mapped to their respective proteins, and  
446 areas summed to estimate protein-level abundance. Proteins without 3 valid values in a minimum  
447 of 1 biological condition were removed and remaining protein abundances were log2 transformed.  
448 Missing values were imputed to simulate the mass spectrometer's limit of detection using Perseus  
449 v1.6.10.43 (i.e., normal distribution, width of 0.3, down shift of 1.9 and mode changed to total  
450 matrix) (41). Significant differences in protein abundance were calculated via T-test for each  
451 sample (S2, S3 and S4) against control group (S1 sample) for each strain using FDR of 0.05, 250  
452 permutations and s0 of 1.

453           All raw mass spectra for quantification of proteins used in this study have been deposited  
454 in the MassIVE and ProteomeXchange data repositories under accession numbers  
455 MSV000085941 (MassIVE) and PXD020854 (ProteomeXchange), with data files available at  
456 <ftp://massive.ucsd.edu/MSV000085941>.

457           **Bioinformatics.** Pathway proteins were annotated using KEGG database (42) and from  
458 literature sources where cited. Ontology associations and orthologs for regulator proteins were  
459 identified using panther database (43).

460 **ACKNOWLEDGEMENT**

461 We would like to acknowledge financial support from the DOE BER Genomic Science Program  
462 (DE-SC0019412 and FWP 3ERKP921). We would also like to thank the DOE's Joint Genome  
463 Institute (JGI) for generating genome sequences of undomesticated *Y. lipolytica* strains through an  
464 EMSL FICUS award (#50384). The work conducted by the U.S. Department of Energy Joint  
465 Genome Institute, a DOE Office of Science User Facility, is supported by the Office of Science of  
466 the U.S. Department of Energy under Contract No. DE-AC02-05CH11231. The views, opinions,  
467 and/or findings contained in this article are those of the authors and should not be interpreted as  
468 representing the official views or policies, either expressed or implied, of the funding agencies.  
469 We also acknowledge the excellent technical support of Rebecca Splitt for the bioreactor studies.

470

## 471 **FIGURE LEGENDS**

472 **Figure 1.** (A) Phylogenetic tree of *Y. lipolytica* isolates with 20 closest neighbor species. (B)  
473 Pangenome of *Y. lipolytica* reference strains CLIB122122 and CBS7504 and undomesticated  
474 strains YB392, YB419, YB420, YB566 and YB567. Bold, strain; parenthesis, total genes; outer  
475 petals, singleton genes, middle petals, uniquely shared genes between lipid producers (blue) and  
476 xylose consumers (green); middle circle, core genes.

477  
478 **Figure 2.** (A) Workflow of bioreactor characterization of *Y. lipolytica* isolates CBS7504 (B, D)  
479 and YB420 (C, E) in 50% SGH. Dotted lines, time of glucose depletion where xylose is the sole  
480 remaining carbon source.

481  
482 **Figure 3.** Proteomic analysis of *Y. lipolytica* (A-C) CBS7504 and (D-F) YB420 strains. (A, D)  
483 Number of proteins with significant abundance changes relative to S1. (B, E) Heatmap of  
484 significant proteins with changed abundance relative to S1. (C, F) Venn diagram illustrating the  
485 number of proteins with significant abundance changes between samples.

486  
487 **Figure 4.** Pentose phosphate pathway proteome of (A) CBS7504 and (B) YB420. Increased  
488 protein abundance during xylose assimilation, red; decreased protein abundance during xylose  
489 assimilation, blue; pathways, rectangles; proteins, bold font; metabolites, plain text. (C) All  
490 transporters and (D) carbohydrate transporters with significant protein abundance changes in the  
491 xylose assimilation phase. CBS7504, blue; YB420, orange. Abbreviations: TKL (transketolase,  
492 YALI0D02277g); PRS1 (ribose-phosphate pyrophosphokinase, YALI0B13552g); Xyl1 (xylose  
493 reductase, YALI0D07634g); Xyl2 (xylitol dehydrogenase, YALI0E12463g); Xyl3 (xylulokinase,

494 YALI0F10923g); ZWF1 (NADP+-dependent glucose-6-phosphate dehydrogenase,  
495 YALI0E22649g); SOL3 (6-phosphogluconolactonase, YALI0E11671g); RPIB (ribose 5-  
496 phosphate isomerase, YALI0F01628g); TAL (transaldolase, YALI0F15587g); RPE1 (ribulose-  
497 phosphate 3-epimerase, YALI0C11880g); GND1 (6-phosphogluconate dehydrogenase,  
498 YALI0B15598g).

499

500 **Figure 5. (A)** Schematic of growth characterization phenotypes for CBS7504 and YB420 when  
501 xylose was the sole remaining carbon source. Proteomic analysis of lipid metabolism showing  
502 increased (red) and decreased (blue) protein abundance when xylose was the sole remaining carbon  
503 source for CBS7504 (**B**) and YB420 (**C**). Proteins, circles; metabolites, regular font; pathways,  
504 bold font. Abbreviations: TAG (triacylglycerol); DHAP (dihydroxyacetone phosphate); Gly-3P  
505 (glycerol-3-phosphate); LPA (lysophosphatidic acid); PA, phosphatidic acid; DAG,  
506 diacylglycerol; PL, phospholipid; TAG, triacylglycerol; FFA, free fatty acid; TCA, tricarboxylic  
507 acid cycle; GPD1 (glycerol-3-phosphate dehydrogenase, YALI0B02948g); SCT1 (bifunctional  
508 glycerol-3-phosphate/glycerone-phosphate O-acyltransferase, YALI0C00209g); ALE1  
509 (lysophosphatidate acyltransferase, YALI0F19514g); SLC1 (1-acyl-sn-glycerol-3-phosphate  
510 acyltransferase, YALI0E18964g); PAP (phosphatidic acid phosphohydrolase, YALI0D27016g);  
511 LPP1 (diacylglycerol diphosphate phosphatase/phosphatidate phosphatase , YALI0B14531g);  
512 DGA1 (acyl-CoA dependent diacylglycerol acyltransferase I, YALI0E32769g); DGA2 (acyl-CoA  
513 dependent diacylglycerol acyltransferase II, YALI0D07986g); TGL3 (triacylglycerol lipases 3,  
514 YALI0D17534g); TGL4 (triacylglycerol lipase 4, YALI0F10010g); YJU3 (monoglycerol lipase,  
515 YALI0C14520g); FAA1 (long-chain acyl-CoA synthetase, YALI0D17864g); FAS1 (fatty acid  
516 synthase 1, YALI0B15059g); FAS2 (fatty acid synthase 2; YALI0B19382g); ACC1 (acetyl-CoA



517 carboxylase, YALI0C11407g); PDH1, PDH2; ACL1 (ATP-citrate lyase, YALI0E34793g); ME  
518 (malic enzyme, YALI0E18634g); MnDH1 (Mannitol dehydrogenase, YALI0B16192g); UGA2  
519 (Succinate semialdehyde dehydrogenase, YALI0F26191g); SOL3 (6-Phosphogluconolactonase,  
520 YALI0E11671g); ZWF1 (NADP+-dependent glucose-6-phosphate dehydrogenase,  
521 YALI0E22649g); POT1 (3-oxyacyl-thiolase, YALI0E18568g); MFE1 (multifunctional  $\beta$ -  
522 oxidation protein, YALI0E15378g); PEX10 (peroxin-10, YALI0C01023g); POX1 (acyl-  
523 coenzyme A oxidase 1, YALI0E32835g); POX2 (acyl-coenzyme A oxidase 2, YALI0F10857g);  
524 POX3 (acyl-coenzyme A oxidase 3, YALI0D24750g); POX4 (acyl-coenzyme A oxidase 4,  
525 YALI0E27654g); POX5 (acyl-coenzyme A oxidase 5, YALI0C23859g); POX6 (acyl-coenzyme  
526 A oxidase 6, YALI0E06567g); YAS2 (HLH transcription factor, YALI0E32417g); POR1  
527 (YALI0D12628g); SNF1 (YALI0D02101g); SAK1 (YALI0D08822g); REI1 (YALI0B08734g);  
528 HSF1 (YALI0E13948g); UPC2 (YALI0B15818g);

529

530 **Figure 6.** Regulator proteins with significant protein abundance changes in the xylose assimilation  
531 phase. CBS7504, blue; YB420, orange.

532

## 533 **Supplementary Materials**

534

535 **Table S1.** Singleton genes of YB392, YB419, YB420, YB566, and YB567.

536

537 **Table S2.** Uniquely shared genes between the undomesticated strains YB566 and YB567.

538

539 **Table S3.** Uniquely shared genes between the undomesticated strains YB392, YB419, and YB420.

540

541 **Table S4.** Proteomic analysis of xylose metabolism and transporters.

542

543 **Table S5.** Proteomic analysis of lipid metabolism, lipid regulators, lipase and NADPH generating  
544 proteins.

545

546 **Table S6.** Proteomic analysis of all gene specific regulators.

547

548 **Figure S1.** Characterization of CBS7504 growing in switchgrass hydrolysate. **(A)** Optical density  
549 measured at 600nm. **(B)** Concentrations of glucose, xylose, acetate, and xylitol. **(C)** Neutral lipids.  
550 **(D)** pH. **(E)** Volumes of base and acid added. **(F)** Percent of dissolved oxygen. Data were collected  
551 from triplicate bioreactor runs.

552

553 **Figure S2:** Characterization of the undomesticated strain YB392 growing in switchgrass  
554 hydrolysate. **(A)** Optical density measured at 600nm. **(B)** Concentrations of glucose, xylose,

555 acetate, and xylitol. **(C)** Neutral lipids. **(D)** pH. **(E)** Volumes of base and acid added. **(F)** Percent  
556 of dissolved oxygen. Data were collected from triplicate bioreactor runs.

557

558 **Figure S3:** Characterization of the undomesticated strain YB419 growing in switchgrass  
559 hydrolysate. **(A)** Optical density measured at 600nm. **(B)** Concentrations of glucose, xylose,  
560 acetate, and xylitol. **(C)** Neutral lipids. **(D)** pH. **(E)** Volumes of base and acid added. **(F)** Percent  
561 of dissolved oxygen. Data were collected from triplicate bioreactor runs.

562

563 **Figure S4:** Characterization of the undomesticated strain YB420 growing in switchgrass  
564 hydrolysate. **(A)** Optical density measured at 600nm. **(B)** Concentrations of glucose, xylose,  
565 acetate, and xylitol. **(C)** Neutral lipids. **(D)** pH. **(E)** Volumes of base and acid added. **(F)** Percent  
566 of dissolved oxygen. Data were collected from triplicate bioreactor runs.

567

568 **Figure S5:** Characterization of the undomesticated strain YB566 growing in switchgrass  
569 hydrolysate. **(A)** Optical density measured at 600nm. **(B)** Concentrations of glucose, xylose,  
570 acetate, and xylitol. **(C)** Neutral lipids. **(D)** pH. **(E)** Volumes of base and acid added. **(F)** Percent  
571 of dissolved oxygen. Data were collected from triplicate bioreactor runs.

572

573 **Figure S6:** Characterization of the undomesticated strain YB567 growing in switchgrass  
574 hydrolysate. **(A)** Optical density measured at 600nm. **(B)** Concentrations of glucose, xylose,  
575 acetate, and xylitol. **(C)** Neutral lipids. **(D)** pH. **(E)** Volumes of base and acid added. **(F)** Percent  
576 of dissolved oxygen. Data were collected from triplicate bioreactor runs.

577

578

579 **Figure 1**

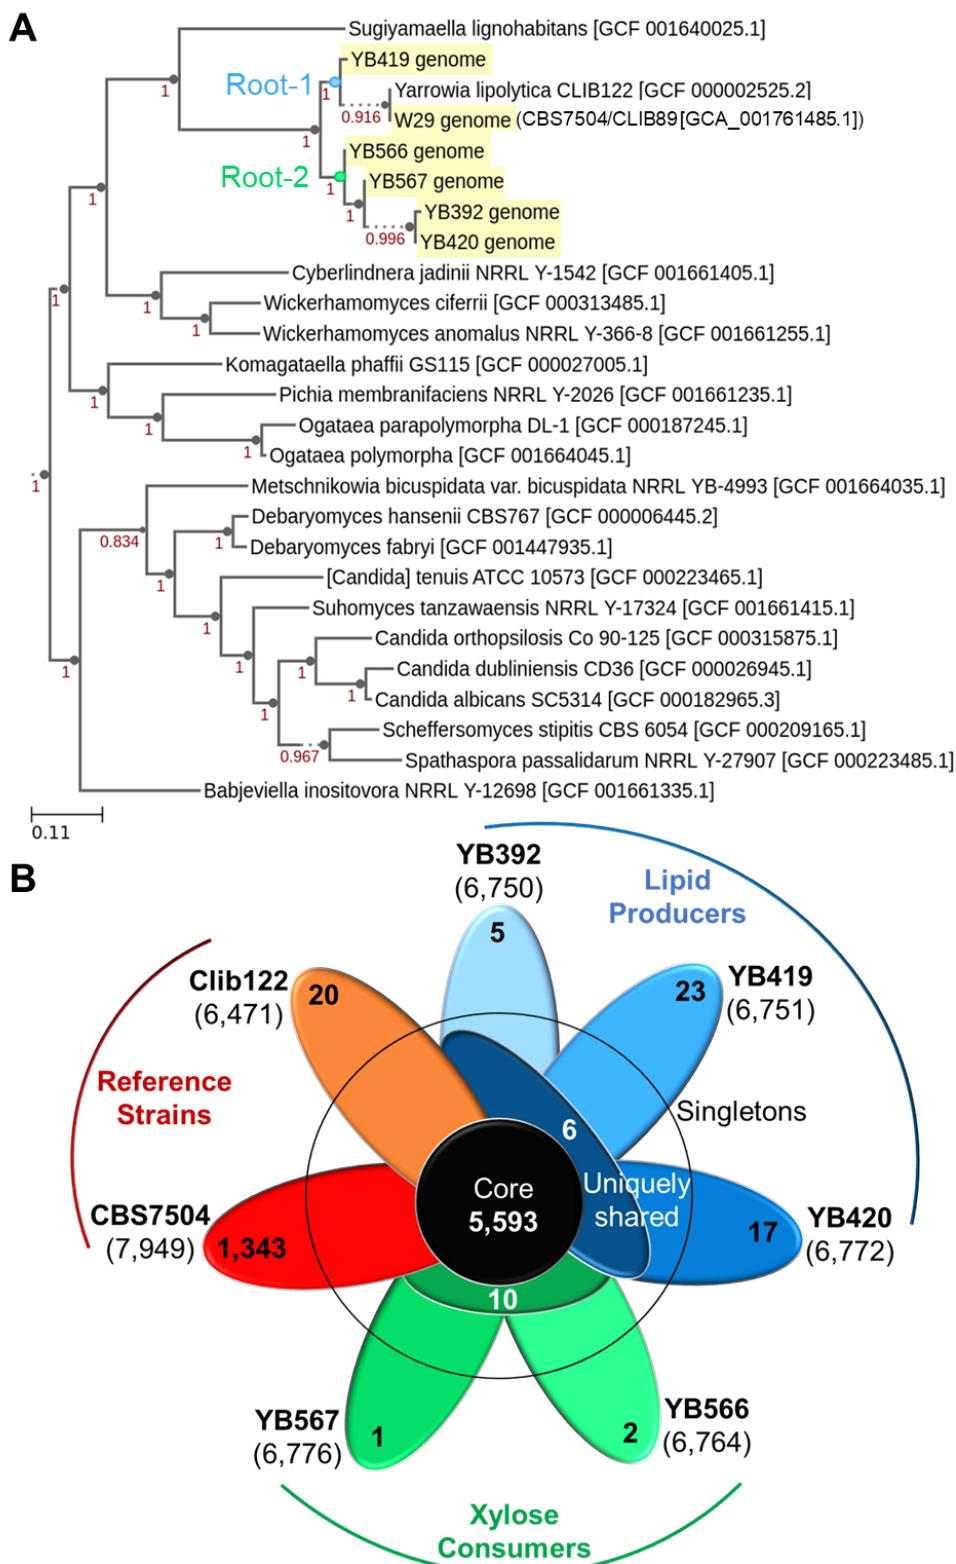

580

581 **Figure 2**

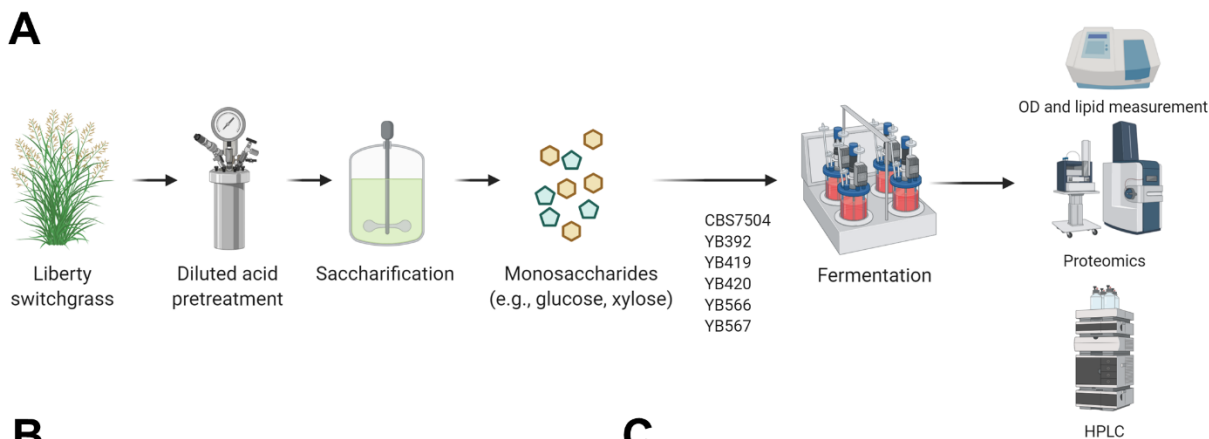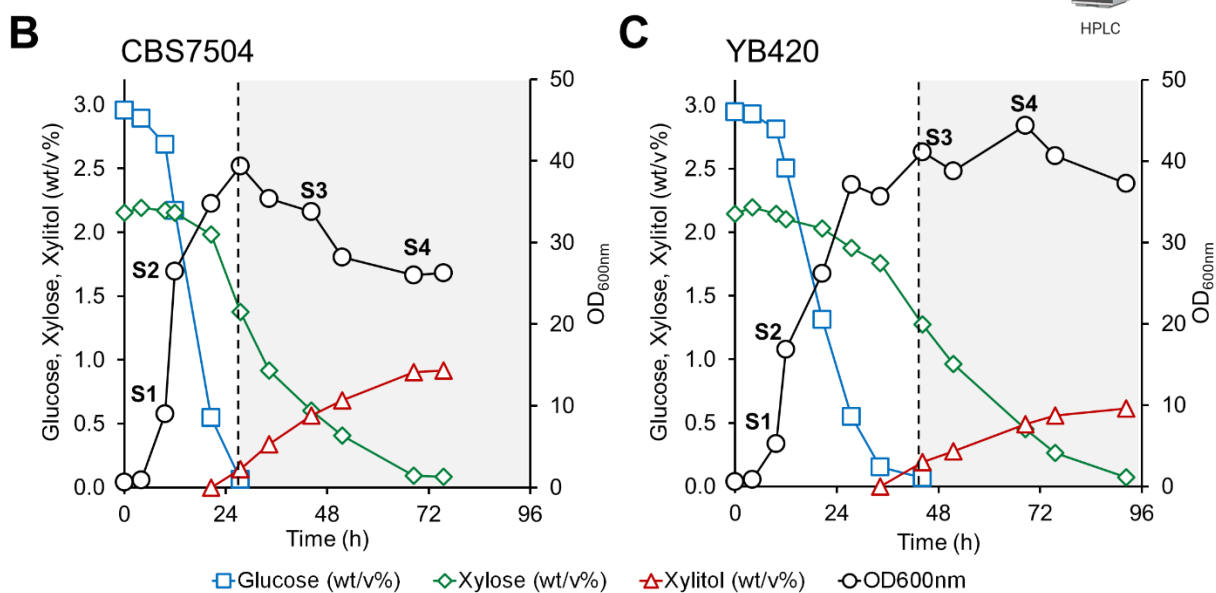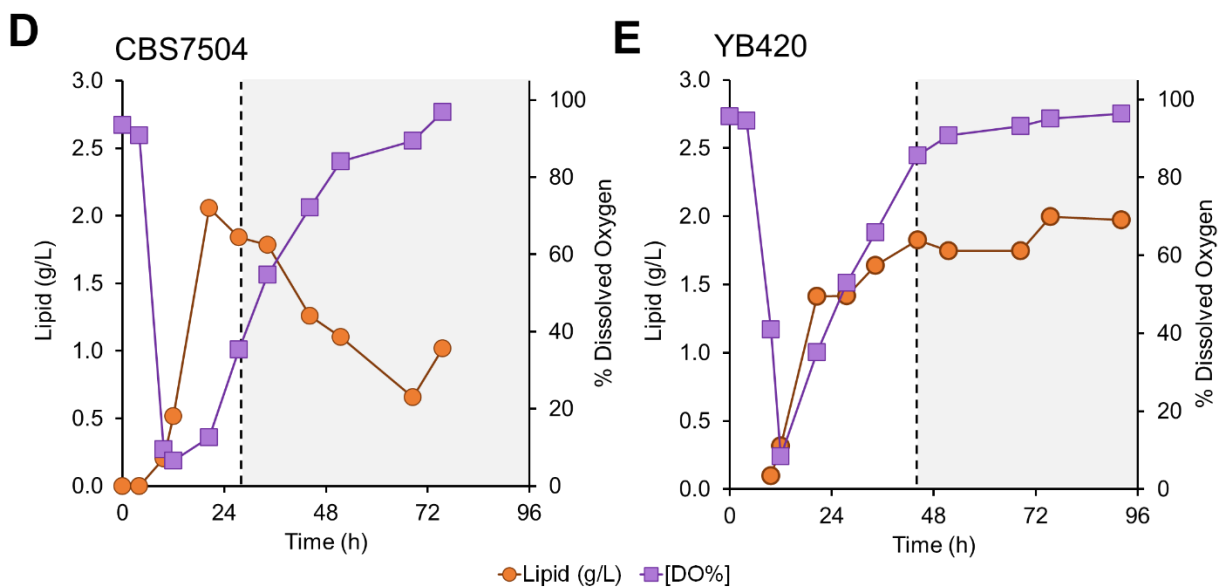

582

583 **Figure 3**

584

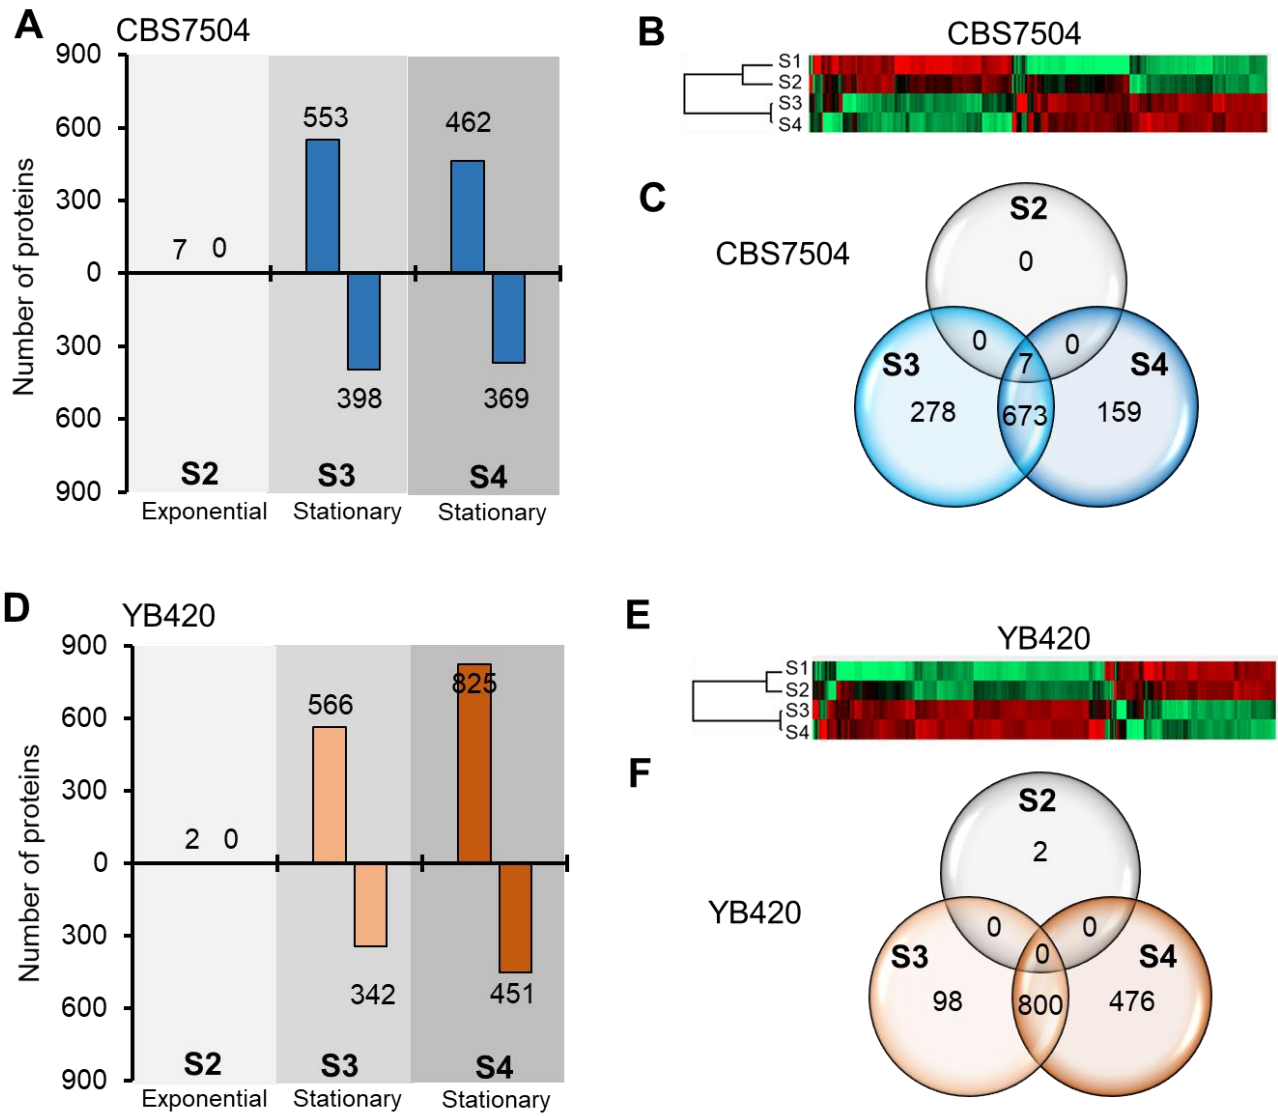

585

586

587 **Figure 4**

588

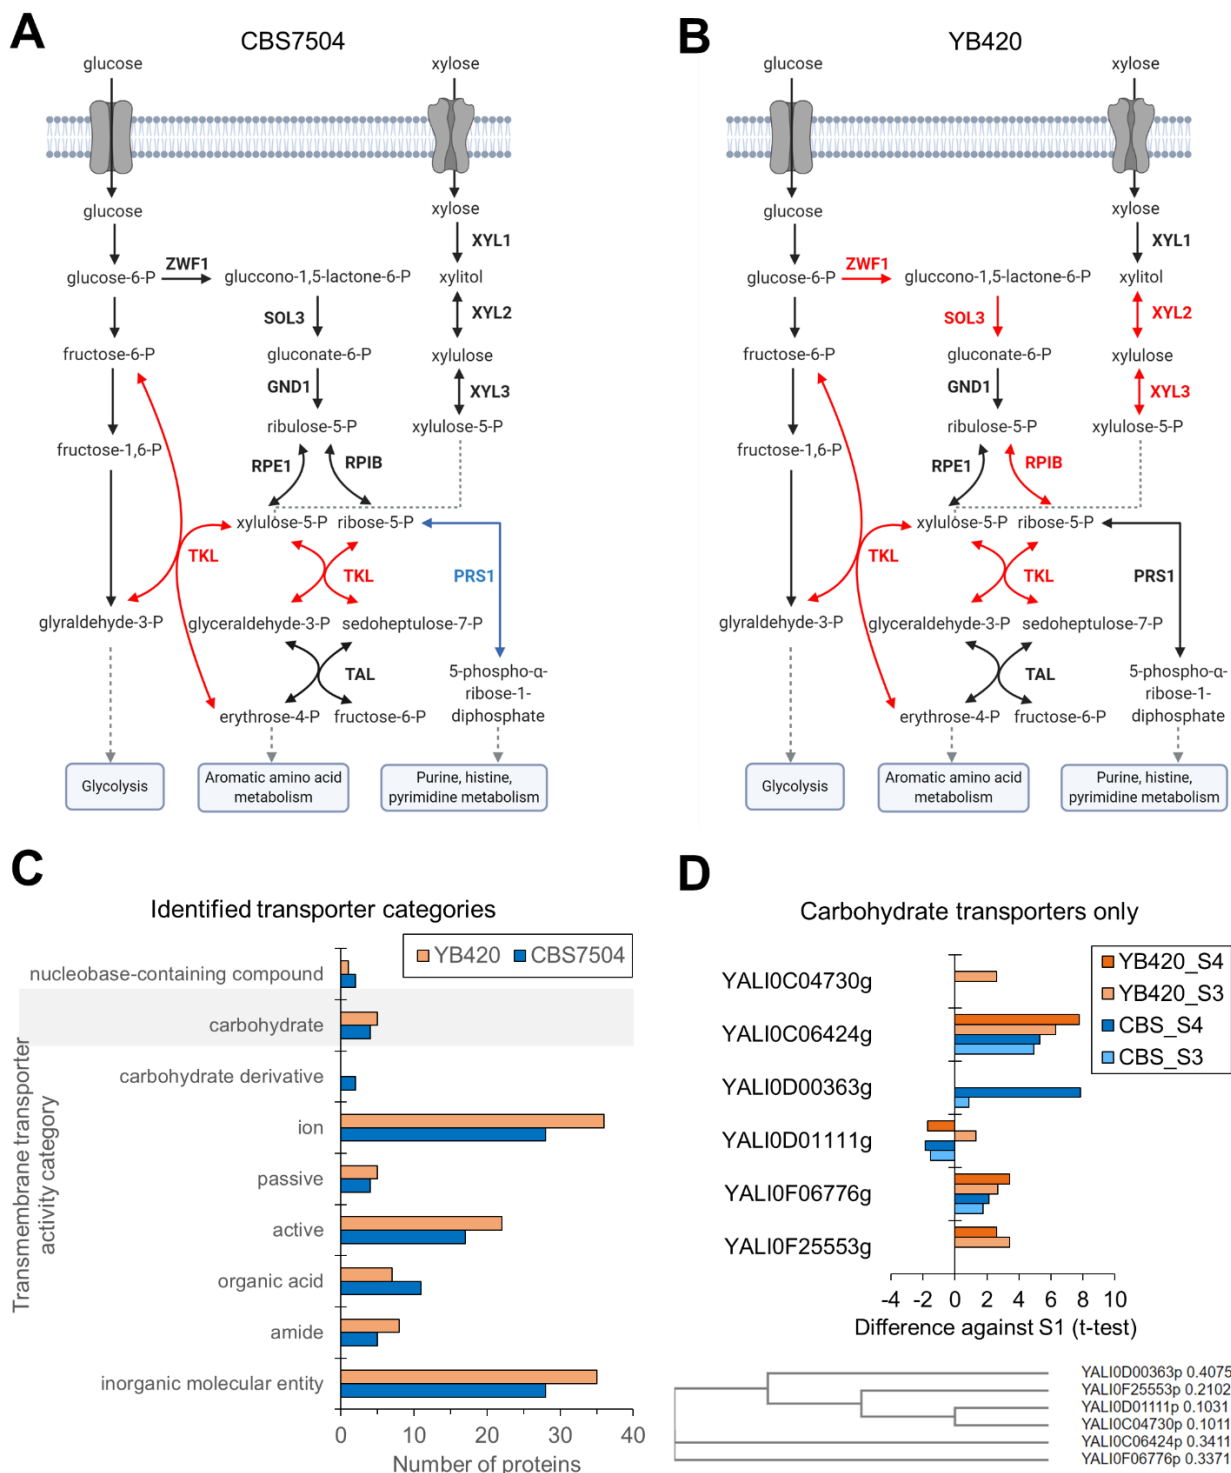

589

590

591 **Figure 5**

592

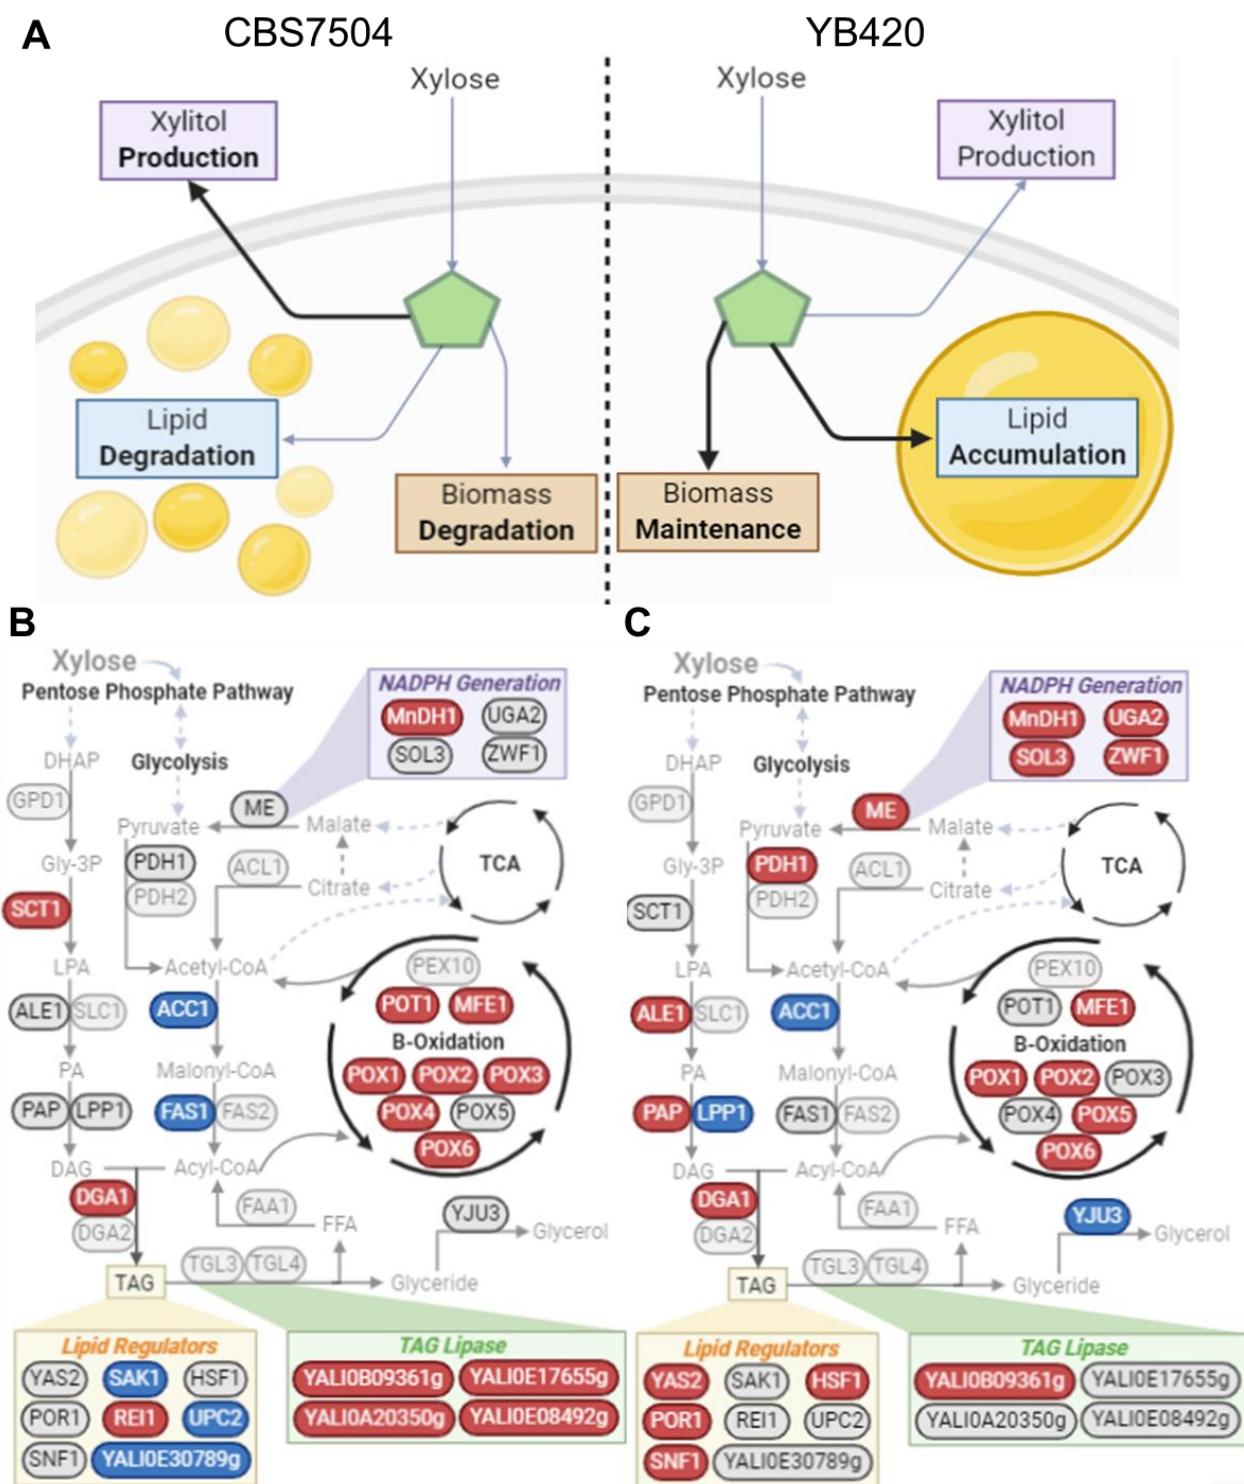

593

594



595 **Figure 6**

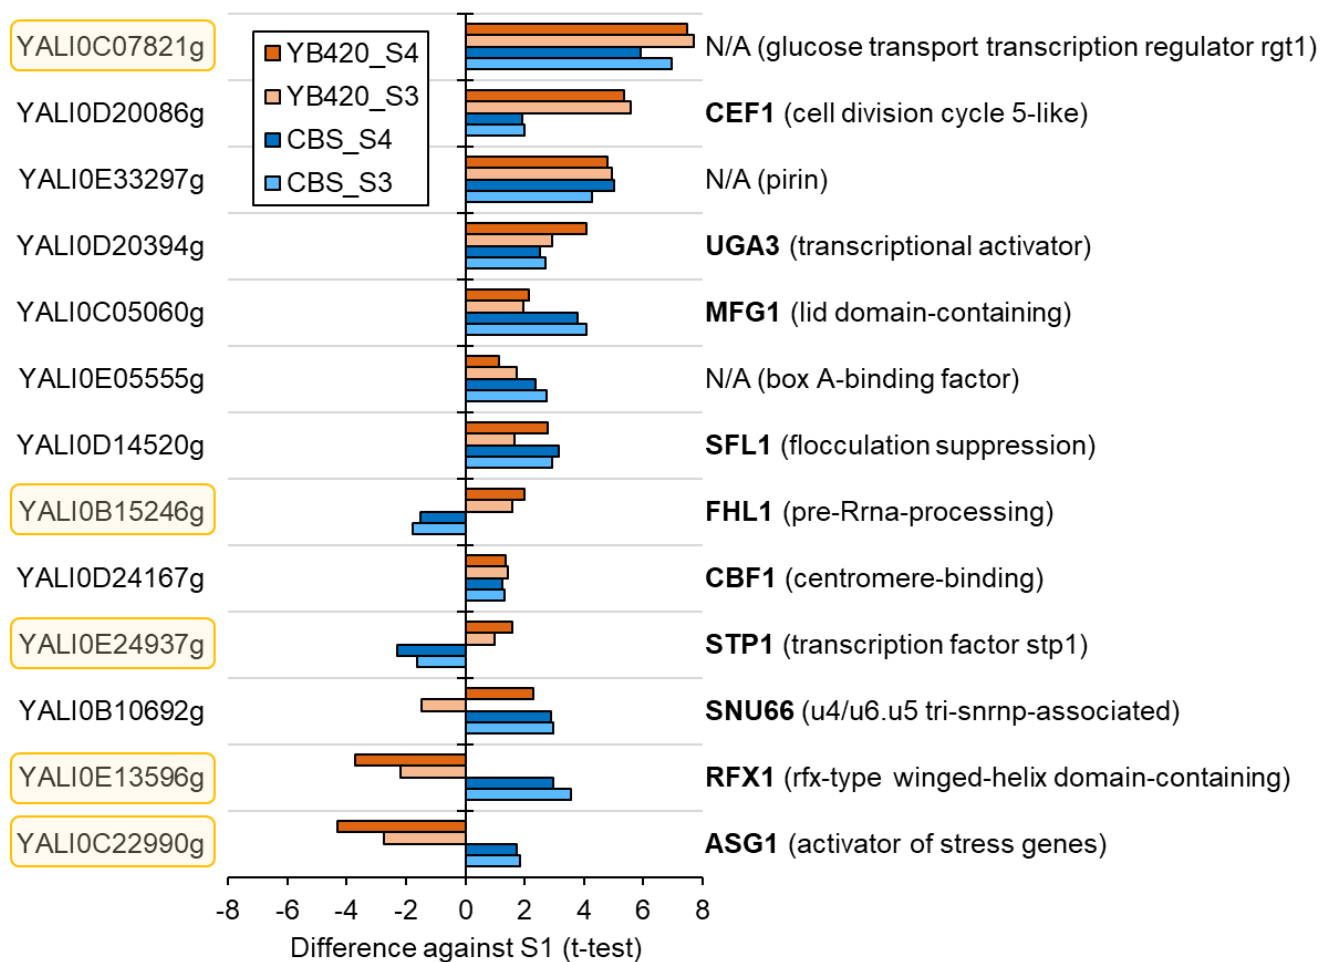

596

597

## 598 REFERENCES

- 599 1. Beopoulos A, Cescut J, Haddouche R, Uribe Larrea J-L, Molina-Jouve C, Nicaud J-M. 2009.  
600 *Yarrowia lipolytica* as a model for bio-oil production. *Progress in Lipid Research* 48:375-  
601 387.
- 602 2. Epova E, Shevelev A, Belyakova A, Isakova E, Kovalyov L, Guseva M, Zylkova M,  
603 Deryabina Y. 2012. Identification of proteins involved in pH adaptation in extremophile  
604 yeast *Yarrowia lipolytica*. INTECH Open Access Publisher.
- 605 3. Andreishcheva E, Isakova E, Sidorov N, Abramova N, Ushakova N, Shaposhnikov G,  
606 Soares M, Zvyagil'skaya R. 1999. Adaptation to salt stress in a salt-tolerant strain of the  
607 yeast *Yarrowia lipolytica*. *Biochemistry c/c of Biokhomiia* 64:1061-1067.
- 608 4. Ryu S, Labbé N, Trinh CT. 2015. Simultaneous saccharification and fermentation of  
609 cellulose in ionic liquid for efficient production of  $\alpha$ -ketoglutaric acid by *Yarrowia*  
610 *lipolytica*. *Applied Microbiology and Biotechnology* 99:4237-4244.
- 611 5. Walker C, Ryu S, Trinh CT. 2019. Exceptional solvent tolerance in *Yarrowia lipolytica* is  
612 enhanced by sterols. *Metabolic Engineering* 54:83-95.
- 613 6. Quarterman J, Slininger PJ, Kurtzman CP, Thompson SR, Dien BS. 2017. A survey of  
614 yeast from the *Yarrowia* clade for lipid production in dilute acid pretreated lignocellulosic  
615 biomass hydrolysate. *Applied Microbiology and Biotechnology* 101:3319-3334.
- 616 7. Wolf K. 2012. *Nonconventional yeasts in biotechnology: a handbook*. Springer Science &  
617 Business Media.
- 618 8. Dulermo T, Nicaud J-M. 2011. Involvement of the G3P shuttle and  $\beta$ -oxidation pathway  
619 in the control of TAG synthesis and lipid accumulation in *Yarrowia lipolytica*. *Metabolic*  
620 *engineering* 13:482-491.

- 621 9. Tai M, Stephanopoulos G. 2013. Engineering the push and pull of lipid biosynthesis in  
622 oleaginous yeast *Yarrowia lipolytica* for biofuel production. *Metabolic Engineering* 15:1-  
623 9.
- 624 10. Beopoulos A, Mrozova Z, Thevenieau F, Le Dall M-T, Hapala I, Papanikolaou S, Chardot  
625 T, Nicaud J-M. 2008. Control of Lipid Accumulation in the Yeast *Yarrowia lipolytica*.  
626 *Applied and Environmental Microbiology* 74:7779.
- 627 11. Seip J, Jackson R, He H, Zhu Q, Hong S-P. 2013. Snf1 Is a Regulator of Lipid  
628 Accumulation in *Yarrowia lipolytica*. *Applied and Environmental Microbiology* 79:7360.
- 629 12. Blazeck J, Hill A, Liu L, Knight R, Miller J, Pan A, Otoupal P, Alper HS. 2014. Harnessing  
630 *Yarrowia lipolytica* lipogenesis to create a platform for lipid and biofuel production. *Nature*  
631 *Communications* 5:3131.
- 632 13. Rodriguez GM, Hussain MS, Gambill L, Gao D, Yaguchi A, Blenner M. 2016. Engineering  
633 xylose utilization in *Yarrowia lipolytica* by understanding its cryptic xylose pathway.  
634 *Biotechnology for Biofuels* 9:149.
- 635 14. Ryu S, Hipp J, Trinh CT. 2016. Activating and Elucidating Metabolism of Complex Sugars  
636 in *Yarrowia lipolytica*. *Applied and Environmental Microbiology* 82:1334.
- 637 15. Niehus X, Crutz-Le Coq A-M, Sandoval G, Nicaud J-M, Ledesma-Amaro R. 2018.  
638 Engineering *Yarrowia lipolytica* to enhance lipid production from lignocellulosic  
639 materials. *Biotechnology for Biofuels* 11:11.
- 640 16. Prabhu AA, Ledesma-Amaro R, Lin CSK, Coulon F, Thakur VK, Kumar V. 2020.  
641 Bioproduction of succinic acid from xylose by engineered *Yarrowia lipolytica* without pH  
642 control. *Biotechnology for Biofuels* 13:113.

- 643 17. Yao F, Liu S-C, Wang D-N, Liu Z-J, Hua Q, Wei L-J. 2020. Engineering oleaginous yeast  
644 *Yarrowia lipolytica* for enhanced limonene production from xylose and lignocellulosic  
645 hydrolysate. *FEMS Yeast Research* 20.
- 646 18. Ledesma-Amaro R, Lazar Z, Rakicka M, Guo Z, Fouchard F, Coq A-MC-L, Nicaud J-M.  
647 2016. Metabolic engineering of *Yarrowia lipolytica* to produce chemicals and fuels from  
648 xylose. *Metabolic Engineering* 38:115-124.
- 649 19. Ryu S, Trinh CT. 2018. Understanding Functional Roles of Native Pentose-Specific  
650 Transporters for Activating Dormant Pentose Metabolism in *Yarrowia lipolytica*. *Applied*  
651 *and Environmental Microbiology* 84:e02146-17.
- 652 20. Walker C, Ryu S, Na H, Zane M, LaButti K, Lipzen A, Haridas S, Barry K, Grigoriev IV,  
653 Quarterman J, Slininger P, Dien B, Trinh CT. 2018. Draft Genome Assemblies of Five  
654 Robust *Yarrowia lipolytica* Strains Exhibiting High Lipid Production, Pentose Sugar  
655 Utilization, and Sugar Alcohol Secretion from Undetoxified Lignocellulosic Biomass  
656 Hydrolysates. *Microbiology Resource Announcements* 7:e01040-18.
- 657 21. Bellasio M, Peymann A, Steiger MG, Valli M, Sipiczki M, Sauer M, Graf AB, Marx H,  
658 Mattanovich D. 2016. Complete genome sequence and transcriptome regulation of the  
659 pentose utilizing yeast *Sugiyamaella lignohabitans*. *FEMS Yeast Research* 16.
- 660 22. Ozcan S, Dover J, Rosenwald AG, Wöfl S, Johnston M. 1996. Two glucose transporters  
661 in *Saccharomyces cerevisiae* are glucose sensors that generate a signal for induction of  
662 gene expression. *Proceedings of the National Academy of Sciences* 93:12428.
- 663 23. Ratledge C. 2014. The role of malic enzyme as the provider of NADPH in oleaginous  
664 microorganisms: a reappraisal and unsolved problems. *Biotechnology Letters* 36:1557-  
665 1568.

- 666 24. Zhang H, Zhang L, Chen H, Chen YQ, Ratledge C, Song Y, Chen W. 2013. Regulatory  
667 properties of malic enzyme in the oleaginous yeast, *Yarrowia lipolytica*, and its non-  
668 involvement in lipid accumulation. *Biotechnology Letters* 35:2091-2098.
- 669 25. Qiao K, Wasylenko TM, Zhou K, Xu P, Stephanopoulos G. 2017. Lipid production in  
670 *Yarrowia lipolytica* is maximized by engineering cytosolic redox metabolism. *Nature*  
671 *Biotechnology* 35:173-177.
- 672 26. Liu H, Marsafari M, Deng L, Xu P. 2019. Understanding lipogenesis by dynamically  
673 profiling transcriptional activity of lipogenic promoters in *Yarrowia lipolytica*. *Applied*  
674 *Microbiology and Biotechnology* 103:3167-3179.
- 675 27. Bellou S, Triantaphyllidou IE, Mizerakis P, Aggelis G. 2016. High lipid accumulation in  
676 *Yarrowia lipolytica* cultivated under double limitation of nitrogen and magnesium. *Journal*  
677 *of Biotechnology* 234:116-126.
- 678 28. Leplat C, Nicaud J-M, Rossignol T. 2018. Overexpression screen reveals transcription  
679 factors involved in lipid accumulation in *Yarrowia lipolytica*. *FEMS Yeast Research* 18.
- 680 29. Silverman AM, Qiao K, Xu P, Stephanopoulos G. 2016. Functional overexpression and  
681 characterization of lipogenesis-related genes in the oleaginous yeast *Yarrowia lipolytica*.  
682 *Applied Microbiology and Biotechnology* 100:3781-3798.
- 683 30. Huang M, Zhou Z, Elledge SJ. 1998. The DNA Replication and Damage Checkpoint  
684 Pathways Induce Transcription by Inhibition of the Crt1 Repressor. *Cell* 94:595-605.
- 685 31. Jansuriyakul S, Somboon P, Rodboon N, Kurylenko O, Sibirny A, Soontorngun N. 2016.  
686 The zinc cluster transcriptional regulator *Asg1* transcriptionally coordinates oleate  
687 utilization and lipid accumulation in *Saccharomyces cerevisiae*. *Applied Microbiology and*  
688 *Biotechnology* 100:4549-4560.

- 689 32. Wang SS, Stanford DR, Silvers CD, Hopper AK. 1992. STP1, a gene involved in pre-tRNA  
690 processing, encodes a nuclear protein containing zinc finger motifs. *Molecular and Cellular*  
691 *Biology* 12:2633.
- 692 33. Jørgensen MU, Gjermansen C, Andersen HA, Kielland-Brandt MC. 1997. STP1, a gene  
693 involved in pre-tRNA processing in yeast, is important for amino-acid uptake and  
694 transcription of the permease gene BAP2. *Current Genetics* 31:241-247.
- 695 34. Rudra D, Zhao Y, Warner JR. 2005. Central role of Ifh1p–Fhl1p interaction in the synthesis  
696 of yeast ribosomal proteins. *The EMBO Journal* 24:533-542.
- 697 35. Li H, Alper HS. 2016. Enabling xylose utilization in *Yarrowia lipolytica* for lipid  
698 production. *Biotechnology Journal* 11:1230-1240.
- 699 36. Yook SD, Kim J, Gong G, Ko JK, Um Y, Han SO, Lee S-M. 2020. High-yield lipid  
700 production from lignocellulosic biomass using engineered xylose-utilizing *Yarrowia*  
701 *lipolytica*. *GCB Bioenergy* 12:670-679.
- 702 37. Quarterman J, Slininger PJ, Kurtzman CP, Thompson SR, Dien BS. 2016. A survey of  
703 yeast from the *Yarrowia* clade for lipid production in dilute acid pretreated lignocellulosic  
704 biomass hydrolysate. *Applied Microbiology and Biotechnology*:1-16.
- 705 38. Bath TS, Tollenaere MX, Rütther P, Gonzalez-Franquesa A, Prabhakar BS, Bekker-Jensen  
706 S, Deshmukh AS, Olsen JV. 2019. Protein aggregation capture on microparticles enables  
707 multipurpose proteomics sample preparation. *Molecular & Cellular Proteomics* 18:1027-  
708 1035.
- 709 39. Walker C, Ryu S, Haridas S, Na H, Zane M, LaButti K, Barry K, Grigoriev IV, Trinh CT.  
710 2020. Draft Genome Assemblies of Ionic Liquid-Resistant *Yarrowia lipolytica* PO1f and  
711 Its Superior Evolved Strain, YICW001. *Microbiology Resource Announcements* 9.

- 712 40. Clarkson SM, Giannone RJ, Kridelbaugh DM, Elkins JG, Guss AM, Michener JK. 2017.  
713 Construction and optimization of a heterologous pathway for protocatechuate catabolism  
714 in *Escherichia coli* enables bioconversion of model aromatic compounds. *Applied and*  
715 *environmental microbiology* 83.
- 716 41. Tyanova S, Temu T, Sinitcyn P, Carlson A, Hein MY, Geiger T, Mann M, Cox J. 2016.  
717 The Perseus computational platform for comprehensive analysis of (prote) omics data.  
718 *Nature methods* 13:731.
- 719 42. Kanehisa M, Goto S. 2000. KEGG: Kyoto Encyclopedia of Genes and Genomes. *Nucleic*  
720 *Acids Res* 28:27 - 30.
- 721 43. Dharmadi Y, Murarka A, Gonzalez R. 2006. Anaerobic fermentation of glycerol by  
722 *Escherichia coli*: a new platform for metabolic engineering. *Biotechnology and*  
723 *bioengineering* 94:821-829.
- 724
